# Supplementary material for: Fluoride-sulfophosphate glasses as hosts for broadband optical amplification through transition metal activators
Source: Royal Society of Chemistry journal article supplement (doi:10.1039/c7tc01853c), 2017-01-01
Supplement: c7tc01853c1.pdf [file c7tc01853c1.pdf]

## Supporting Information

TITLE: Fluoride-sulfophosphate glasses as host for broadband optical amplification through transition metal activators

W. C. Wang,<sup>a,b</sup> Q. H. Le,<sup>a</sup> Q. Y. Zhang,<sup>b</sup> and L. Wondraczek<sup>\*a</sup>

<sup>a</sup>*Otto Schott Institute of Materials Research, University of Jena, Fraunhoferstraße 6, 07743 Jena, Germany*

<sup>b</sup>*State Key Laboratory of Luminescent Materials and Devices, Guangdong Provincial Key Laboratory of Fiber Laser Materials and Applied Techniques, and Institute of Optical Communication Materials, South China University of Technology, Guangzhou 510641, P. R. China.*

**\*Email:** [lothar.wondraczek@uni-jena.de](mailto:lothar.wondraczek@uni-jena.de)

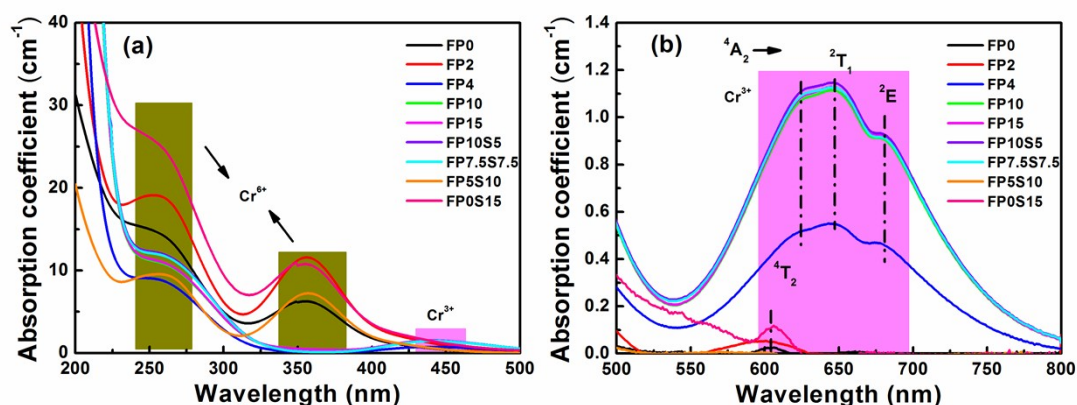

Fig. S1 Optical absorption spectra of chromium-doped FP and FPS glasses across the spectral regions of (a) 200-500 nm and (b) 500-800 nm.

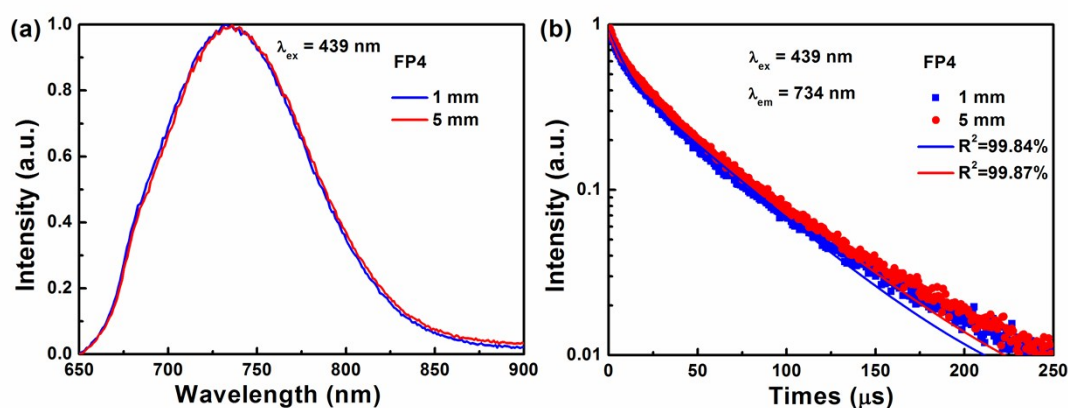

Fig. S2 (a) Emission spectra and (b) decay curves of Cr³⁺-doped FP4 glass samples with different thickness.
